# Supplementary material for: Clonal Architecture of Secondary Acute Myeloid Leukemia Defined by Single-Cell Sequencing
Source: PubMed Central journal article supplement (PMC4091781; doi:10.1371/journal.pgen.1004462), 2014-07-10
Supplement: pgen.1004462.s005.pdf [file pgen.1004462.s005.pdf]

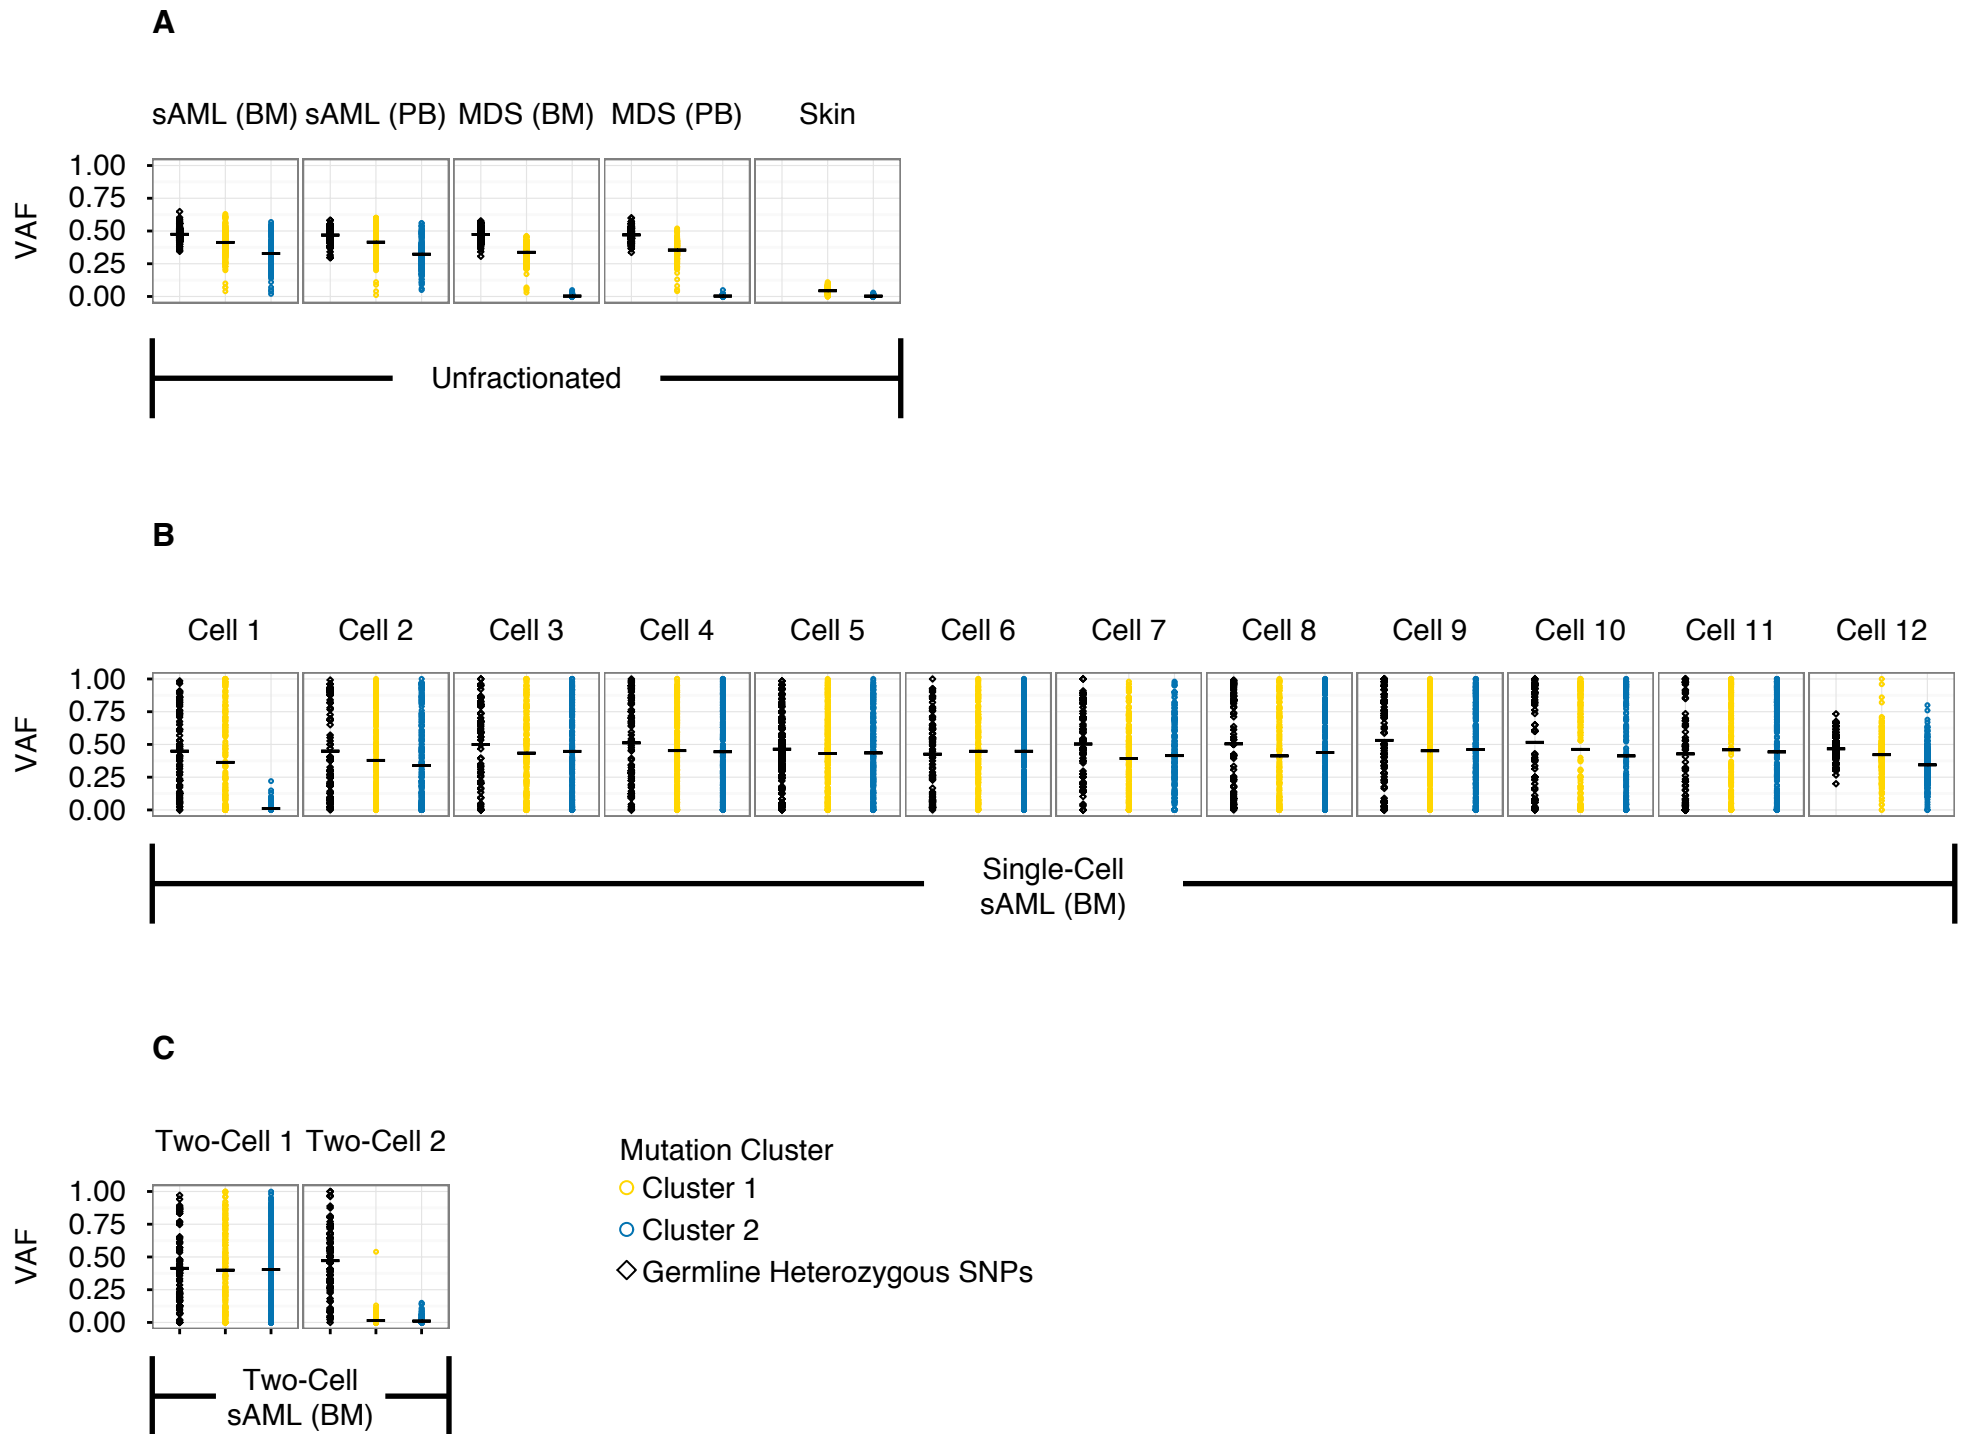

Figure S5
