# Supplementary material for: Clonal Architecture of Secondary Acute Myeloid Leukemia Defined by Single-Cell Sequencing
Source: PLoS Genet. 2014 Jul 10;10(7):e1004462. doi: 10.1371/journal.pgen.1004462 (PMC4091781; doi:10.1371/journal.pgen.1004462)
Supplement: Table S5 — Identity confirmation at somatic SNVs. For each subject, summary of non-reference calls at positions harboring somatic SNVs in either of the other two subjects. Somatic SNVs were mutually exclusive between subjects, so the expected non-reference call rate is 0, and non-reference calls constitute false positives. These data provided additional verification that each sample was derived from the intended subject (overall false positive rate (FPR)<0.01). (XLSX) [file pgen.1004462.s013.xlsx]

## Sheet: Sheet1
Table S5: Identity Confirmation at Somatic SNVs
Subject ID	Sample ID	Sample Type	Disease Status	Tissue	SNVs ≥25X	Non-Reference NGS Call	FPR
UPN461282	137877407	Unfractionated	sAML	Bone Marrow	1079	1	0.000926784
UPN461282	137879233	Unfractionated	MDS	Bone Marrow	1076	3	0.0027881
UPN461282	137878477	Unfractionated	MDS	Peripheral Blood	1080	2	0.00185185
UPN461282	137877288	Unfractionated	Normal	Skin	1076	2	0.00185874
UPN461282	137877363	Single-Cell	sAML	Bone Marrow	552	8	0.0144928
UPN461282	137877442	Single-Cell	sAML	Bone Marrow	568	13	0.0228873
UPN461282	137877811	Single-Cell	sAML	Bone Marrow	618	8	0.012945
UPN461282	137878438	Single-Cell	sAML	Bone Marrow	633	4	0.00631912
UPN461282	137878455	Single-Cell	sAML	Bone Marrow	630	8	0.0126984
UPN461282	137879142	Single-Cell	sAML	Bone Marrow	533	10	0.0187617
UPN461282	137879234	Single-Cell	sAML	Bone Marrow	611	5	0.00818331
UPN461282	137879235	Single-Cell	sAML	Bone Marrow	548	3	0.00547445
UPN461282	137879240	Single-Cell	sAML	Bone Marrow	553	9	0.0162749
UPN461282	137879273	Single-Cell	sAML	Bone Marrow	553	5	0.00904159
UPN461282	137879300	Single-Cell	sAML	Bone Marrow	633	5	0.00789889
UPN461282	137879308	Single-Cell	sAML	Bone Marrow	662	7	0.010574
UPN461282	137879330	Two-Cell	sAML	Bone Marrow	575	4	0.00695652
UPN461282	137879461	Two-Cell	sAML	Bone Marrow	592	4	0.00675676
UPN182896	137872215	Unfractionated	sAML	Bone Marrow	1172	0	0
UPN182896	137873338	Unfractionated	sAML	Peripheral Blood	1174	0	0
UPN182896	137872266	Unfractionated	MDS	Bone Marrow	1165	1	0.000858369
UPN182896	137872312	Unfractionated	MDS	Peripheral Blood	1174	0	0
UPN182896	137872227	Unfractionated	Normal	Skin	1169	0	0
UPN182896	137872621	Single-Cell	sAML	Bone Marrow	623	7	0.011236
UPN182896	137872639	Single-Cell	sAML	Bone Marrow	569	2	0.00351494
UPN182896	137872906	Single-Cell	sAML	Bone Marrow	664	5	0.00753012
UPN182896	137872995	Single-Cell	sAML	Bone Marrow	537	4	0.00744879
UPN182896	137873080	Single-Cell	sAML	Bone Marrow	697	4	0.00573888
UPN182896	137873245	Single-Cell	sAML	Bone Marrow	634	4	0.00630915
UPN182896	137873289	Single-Cell	sAML	Bone Marrow	725	7	0.00965517
UPN182896	137873378	Single-Cell	sAML	Bone Marrow	729	4	0.00548697
UPN182896	137873507	Single-Cell	sAML	Bone Marrow	738	5	0.00677507
UPN182896	137873521	Single-Cell	sAML	Bone Marrow	730	4	0.00547945
UPN182896	137873557	Single-Cell	sAML	Bone Marrow	622	20	0.0321543
UPN182896	137874549	Single-Cell	sAML	Bone Marrow	511	7	0.0136986
UPN182896	137873871	Two-Cell	sAML	Bone Marrow	634	10	0.0157729
UPN182896	137874188	Two-Cell	sAML	Bone Marrow	616	6	0.00974026
UPN288033	137874461	Unfractionated	sAML	Bone Marrow	1640	1	0.000609756
UPN288033	137878157	Unfractionated	sAML	Peripheral Blood	1642	0	0
UPN288033	137877084	Unfractionated	MDS	Bone Marrow	1620	3	0.00185185
UPN288033	137875517	Unfractionated	MDS	Peripheral Blood	1643	2	0.00121729
UPN288033	137874407	Unfractionated	Normal	Skin	1638	0	0
UPN288033	137874703	Single-Cell	sAML	Bone Marrow	908	16	0.0176211
UPN288033	137875394	Single-Cell	sAML	Bone Marrow	904	6	0.00663717
UPN288033	137875829	Single-Cell	sAML	Bone Marrow	957	4	0.00417973
UPN288033	137876331	Single-Cell	sAML	Bone Marrow	854	11	0.0128806
UPN288033	137876359	Single-Cell	sAML	Bone Marrow	970	4	0.00412371
UPN288033	137876718	Single-Cell	sAML	Bone Marrow	1014	4	0.00394477
UPN288033	137876803	Single-Cell	sAML	Bone Marrow	1054	9	0.0085389
UPN288033	137876817	Single-Cell	sAML	Bone Marrow	998	12	0.012024
UPN288033	137876827	Single-Cell	sAML	Bone Marrow	871	5	0.00574053
UPN288033	137876984	Single-Cell	sAML	Bone Marrow	994	9	0.00905433
UPN288033	137877026	Single-Cell	sAML	Bone Marrow	1037	8	0.00771456
UPN288033	137877163	Single-Cell	sAML	Bone Marrow	737	3	0.00407056
UPN288033	137876792	Two-Cell	sAML	Bone Marrow	919	7	0.00761697
UPN288033	137876897	Two-Cell	sAML	Bone Marrow	868	4	0.00460829
